# Supplementary material for: The methyl-CpG-binding domain 2 facilitates pulmonary fibrosis by orchestrating fibroblast to myofibroblast differentiation
Source: PubMed Central journal article supplement — Eur Respir J. 2022 Sep 29;60(3):2003697. doi: 10.1183/13993003.03697-2020 (PMC9520034; doi:10.1183/13993003.03697-2020), 2022-09-29
Supplement: ERJ-03697-2020.Table_S1.pdf [file ERJ-03697-2020.Table_S1.pdf]

**Supplementary Table S1. Characteristics of subjects for lung samples**

|                          | Lung samples  |                   | P value |
|--------------------------|---------------|-------------------|---------|
|                          | IPF ( N = 8 ) | Control ( N = 6 ) |         |
| Age (years)              | 58.50 ± 3.645 | 55.17 ± 6.024     | 0.6265  |
| Smoking index            | 41.10 ± 19.15 | 46.58 ± 24.90     | 0.8620  |
| BMI                      | 22.18 ± 1.170 | 23.40 ± 0.3360    | 0.3966  |
| Sex                      |               |                   |         |
| Female                   | 3 (37.50%)    | 2 (33.33%)        | 0.8860  |
| Male                     | 5 (62.50%)    | 4 (66.67%)        |         |
| FVC<br>Percent Predicted | 65.04 ± 4.565 | NA                |         |
| DLCO                     | 42.10 ± 4.011 | NA                |         |

FVC: Forced vital capacity      DLCO: diffusion capacity for carbon monoxide
