# Supplementary material for: The methyl-CpG-binding domain 2 facilitates pulmonary fibrosis by orchestrating fibroblast to myofibroblast differentiation
Source: PubMed Central journal article supplement — Eur Respir J. 2022 Sep 29;60(3):2003697. doi: 10.1183/13993003.03697-2020 (PMC9520034; doi:10.1183/13993003.03697-2020), 2022-09-29
Supplement: ERJ-03697-2020.Table_S2.pdf [file ERJ-03697-2020.Table_S2.pdf]

**Supplementary Table S2.** The primer sequences for RT-PCR

|                     |         |                                          |
|---------------------|---------|------------------------------------------|
| human <i>FN1</i>    | forward | 5'-GAT GTC CGA ACA GCT ATT TAC CA-3'     |
|                     | reverse | 5'-CGA CCA CAT AGG AAG TCC CAG-3'        |
| human <i>COL1A1</i> | forward | 5'-GAG GGC CAA GAC GAA GAC ATC-3'        |
|                     | reverse | 5'-CAG ATC ACG TCA TCG CAC AAC-3'        |
| human <i>ACTA2</i>  | forward | 5'-GAC GCT GAA GTA TCC GAT AGA ACA CG-3' |
|                     | reverse | 5'-CAC CAT CTC CAG AGT CCA GCA CAA T-3'  |
| human <i>ACTB</i>   | forward | 5'-AGC GAG CAT CCC CCA AAG TT-3'         |
|                     | reverse | 5'-GGG CAC GAA GGC TCA TCA TT-3'         |
| mouse <i>Fn1</i>    | forward | 5'-ATG CAA CGA TCA GGA CAC AA -3'        |
|                     | reverse | 5'-TGT GCC TCT CAC ACT TCC AC-3'         |
| mouse <i>Col1a1</i> | forward | 5'-CCT GGT AAA GAT GGT GCC-3'            |
|                     | reverse | 5'-CAC CAG GTT CAC CTT TCG CAC C-3'      |
| mouse <i>Acta2</i>  | forward | 5'-CGT ACA ACT GGT ATT GTG CTG GAC-3'    |
|                     | reverse | 5'-TGA TGT CAC GGA CAA TCT CAC GCT-3'    |
| mouse <i>Actb</i>   | forward | 5'-TGA CGT TGA CAT CCG TAA AGA CC-3'     |
|                     | reverse | 5'-CTC AGG AGG AGC AAT GAT CTT GA-3'     |
